# Supplementary material for: Current guidelines on the management of gestational diabetes mellitus: a content analysis and appraisal
Source: BMC Pregnancy Childbirth. 2019 Jun 13;19:200. doi: 10.1186/s12884-019-2343-2 (PMC6567433; doi:10.1186/s12884-019-2343-2)
Supplement: Supplementary file 3 — Recommendations Extraction of SIGN guideline. The SIGN guideline was developed using a standard methodology according to SIGN guideline manual. There were 18 relevant recommendations being extracted, which were displayed and appraised in Additional file 3. (XLSX 16 kb) [file 12884_2019_2343_MOESM3_ESM.xlsx]

## Sheet: SIGN
Basic information
Title of guideline		Management of diabetes: A national clinical guideline
Development institute		SIGN
Publication year		Published 2010, updated 2014
Guideline type		Evidence-based guideline
Guideline methodology		the guideline was developed using a standard methodology according to SIGN guideline manual
Quality assessment of evidence and grading of strength of recommendations		Level of evidence 1++ High quality meta-analyses, systematic reviews of RCTs, or RCTs with a very low risk of bias 1+ Well conducted meta-analyses, systematic reviews, or RCTs with a low risk of bias 1 - Meta-analyses, systematic reviews, or RCTs with a high risk of bias 2++ High quality systematic reviews of case control or cohort studies High quality case control or cohort studies with a very l…
Guideline Currency	Literature search date	2003-2009, search updated 2013
	Search strategy	A comprehensive literature search was performed
Methodological quality of guideline
AGREE II scores	Domain 1. Scope and Purpose	1
	Domain 2. Stakeholder Involvement	1
	Domain 3. Rigor of Development	0.97
	Domain 4. Clarity of Presentation	1
	Domain 5. Applicability	1
	Domain 6. Editorial Independence	1
	Overall assessment	Recommend
Recommendation extraction and assessment
Diagnosis of GDM
Health question 1		Risk factors
Specific recommendation		NONE
Strength of recommendation
Supporting evidence
Consistency appraisal	Search strategy and selection of evidence
	Evidence and interpretation
	Interpretation and recommendation
Health question 2		Screening
Specific recommendation		1.At booking all women should be assessed for the presence of risk factors for gestational diabetes.	2.All women with risk factors should have HbA1c or fasting glucose measured.  Women in early pregnancy with levels of HbA1c≥6.5% (48 mmol/mol), fasting ≥7.0 mmol/l or two hour ≥11.1 mmol/l glucose diagnostic of diabetes should be treated as having pre-existing diabetes.  Women with intermediate levels of glucose (HbA1c 6.0 to 6.4% or 42 to 46 mmol/mol), fasting glucose 5.1 to 6.9 mmol/l or two …	3.All women with risk factors should have a 75 g OGTT at 24-28 weeks. A fasting plasma glucose at 24-28 weeks is recommended in low-risk women.
Strength of recommendation		GPP	GPP	GPP
Supporting evidence		clinical experience, expert opinions; EL=4	clinical experience, expert opinions; EL=4	expert opinions; EL=4; HAPO study, EL=2++
Consistency appraisal	Search strategy and selection of evidence	7	7	6
	Evidence and interpretation	7	7	6
	Interpretation and recommendation	5	5	5
Health question 3		Diagnostic criteria
Specific recommendation		4.The adoption of internationally agreed criteria for gestational diabetes using 75 g OGTT is recommended:  fasting venous plasma glucose ≥5.1 mmol/l, or  one hour value ≥10 mmol/l, or  two hours after OGTT ≥8.5 mmol/l.	5.Women with frank diabetes by non-pregnant criteria (fasting venous glucose ≥7 mmol/l, two hour ≥11.1 mmol/l) should be managed within a multidisciplinary clinic as they may have type 1 or type 2 diabetes and be at risk of pregnancy outcomes similar to those of women with pre-gestational diabetes.
Strength of recommendation		GPP	GPP
Supporting evidence		International consensus; EL=1+,4	RCT; EL=2++
Consistency appraisal	Search strategy and selection of evidence	5	5
	Evidence and interpretation	5	5
	Interpretation and recommendation	4	4
Prenatal Care
Health question 4		Health education
Specific recommendation		6.Pregnant women with GDM should be offered dietary advice and blood glucose monitoring and be treated with glucose-lowering therapy depending on target values for fasting and postprandial targets.	7.A suitable programme to detect and treat gestational diabetes should be offered to all women in pregnancy.
Strength of recommendation		A	A
Supporting evidence		2 Evidence body; EL=1+, 1+	3 Evidence body; EL=1+, 1+, 2+
Consistency appraisal	Search strategy and selection of evidence	7	7
	Evidence and interpretation	7	7
	Interpretation and recommendation	5	5
Health question 5		Medical nutrition therapy
Specific recommendation		NONE
Strength of recommendation
Supporting evidence
Consistency appraisal	Search strategy and selection of evidence
	Evidence and interpretation
	Interpretation and recommendation
Health question 6		Physical activity
Specific recommendation		NONE
Strength of recommendation
Supporting evidence
Consistency appraisal	Search strategy and selection of evidence
	Evidence and interpretation
	Interpretation and recommendation
Health question 7		Pharmacological therapy
Specific recommendation		8.Glucose-lowering therapy should be considered in addition to diet where fasting or two hour glucose levels are above target, for example, where two or more values per fortnight are:  ≥5.5 mmol/l preprandial or ≥7 mmol/l two hours postprandial on monitoring at≤35 weeks  ≥5.5 mmol/l preprandial or ≥8 mmol/l two hours postprandial on monitoring at>35 weeks, or  any postprandial values are >9 mm…	9.Metformin or glibenclamide may be considered as initial pharmacological, glucoselowering treatment in women with gestational diabetes.	10.While metformin and glibenclamide may be used to treat GDM (gestational diabetes mellitus see section 7.8.3), sulphonylureas other than glibenclamide should not be used during pregnancy due to placental passage.
Strength of recommendation		GPP	B	GPP
Supporting evidence		2 Evidence body; EL=1+, 1+	2 Evidence body; EL=1+, 1+	1 Evidence body; EL=2+
Consistency appraisal	Search strategy and selection of evidence	5	6	7
	Evidence and interpretation	6	6	7
	Interpretation and recommendation	5	5	5
Health question 8		Blood glucose monitoring
Specific recommendation		11.Postprandial glucose monitoring should be carried out in pregnant women with gestational diabetes and may be considered in pregnant women with type 1 or 2 diabetes.
Strength of recommendation		C
Supporting evidence		2 Evidence body; EL=1+, 1+
Consistency appraisal	Search strategy and selection of evidence	7
	Evidence and interpretation	7
	Interpretation and recommendation	5
Health question 9		Target blood glucose values
Specific recommendation		NONE
Strength of recommendation
Supporting evidence
Consistency appraisal	Search strategy and selection of evidence
	Evidence and interpretation
	Interpretation and recommendation
Health question 10		Ketone monitoring
Specific recommendation		NONE
Strength of recommendation
Supporting evidence
Consistency appraisal	Search strategy and selection of evidence
	Evidence and interpretation
	Interpretation and recommendation
Health question 11		HbA1c monitoring
Specific recommendation		NONE
Strength of recommendation
Supporting evidence
Consistency appraisal	Search strategy and selection of evidence
	Evidence and interpretation
	Interpretation and recommendation
Health question 12		Continuous glucose monitoring
Specific recommendation		NONE
Strength of recommendation
Supporting evidence
Consistency appraisal	Search strategy and selection of evidence
	Evidence and interpretation
	Interpretation and recommendation
Health question 13		Fetal monitoring
Specific recommendation		12.where IUGR is suspected, regular monitoring including growth scans and umbilical artery doppler should be carried out.	13.In the absence of IUGR, monitoring of fetal growth can be used but given the inaccuracies in estimating fetal weight it is important that this is not used as a sole method of determining timing or mode of delivery.
Strength of recommendation		C	GPP
Supporting evidence		2 Evidence body; EL=3, 1+	7 Evidence body; EL= 2++, 2+, 2++, 2+, 2+, 3, 1+
Consistency appraisal	Search strategy and selection of evidence	6	6
	Evidence and interpretation	6	6
	Interpretation and recommendation	5	5
Intrapartum Care
Health question 14		Timing and mode of birth
Specific recommendation		14.1）Women with diabetes requiring insulin or oral glucose-lowering medication who have pregnancies which are otherwise progressing normally should be assessed at 38 weeks gestation with delivery shortly after, and certainly by 40 weeks. 2）Women with diabetes should be delivered in consultant-led maternity units under the combined care of a physician with an interest in diabetes, obstetrician, a…
Strength of recommendation		GPP
Supporting evidence		3 Evidence body; EL= 3, 1++, 2+
Consistency appraisal	Search strategy and selection of evidence	3
	Evidence and interpretation	4
	Interpretation and recommendation	3
Health question 15		Glycemic control during labor
Specific recommendation		Refer to timing and mode of birth
Strength of recommendation
Supporting evidence
Consistency appraisal	Search strategy and selection of evidence
	Evidence and interpretation
	Interpretation and recommendation
Neonatal Care
Health question 16		Neonatal hypoglycemia
Specific recommendation		15.Early feeding is advised to avoid neonatal hypoglycaemia and to stimulate lactation.
Strength of recommendation		GPP
Supporting evidence		3 Evidence body; EL= 4, 2+, 3
Consistency appraisal	Search strategy and selection of evidence	5
	Evidence and interpretation	5
	Interpretation and recommendation	4
Health question 17		Initial assessment
Specific recommendation		NONE
Strength of recommendation
Supporting evidence
Consistency appraisal	Search strategy and selection of evidence
	Evidence and interpretation
	Interpretation and recommendation
Postpartum Care
Health question 18		Blood glucose control
Specific recommendation		NONE
Strength of recommendation
Supporting evidence
Consistency appraisal	Search strategy and selection of evidence
	Evidence and interpretation
	Interpretation and recommendation
Health question 19		Information and follow-up
Specific recommendation		16.women who have developed GDM should be given diet, weight control and exercise advice.
Strength of recommendation		C
Supporting evidence		2 Evidence body; EL= 2++, 2+
Consistency appraisal	Search strategy and selection of evidence	5
	Evidence and interpretation	6
	Interpretation and recommendation	5
Health question 20		Postnatal blood glucose testing
Specific recommendation		17.women who have developed GDM should be reminded of the need for pre-conception counselling and appropriate testing to detect progression to type 2 diabetes	18.Where diabetes is not apparent immediately after delivery, glucose tolerance should be reassessed at least six weeks postpartum with a minimum of fasting glucose and with 75 g OGTT if clinically indicated. An annual assessment of glycaemia using fasting glucose or HbA1c should be carried out thereafter.
Strength of recommendation		C	GPP
Supporting evidence		2 Evidence body; EL= 2++, 2+	2 Evidence body; EL= 2++, 2+
Consistency appraisal	Search strategy and selection of evidence	5	5
	Evidence and interpretation	6	5
	Interpretation and recommendation	5	4
