# Supplementary material for: Current guidelines on the management of gestational diabetes mellitus: a content analysis and appraisal
Source: BMC Pregnancy Childbirth. 2019 Jun 13;19:200. doi: 10.1186/s12884-019-2343-2 (PMC6567433; doi:10.1186/s12884-019-2343-2)
Supplement: Supplementary file 10 — Recommendations Extraction of Queensland guideline. The Queensland guideline was developed based on evidence, and there were 8 relevant recommendations being extracted, which were displayed and appraised in Additional file 10. (XLSX 14 kb) [file 12884_2019_2343_MOESM10_ESM.xlsx]

## Sheet: Queensland
Basic information
Title of guideline		Queensland Clinical Guideline: Gestational diabetes mellitus
Development institute		Department of Health
Publication year		Published 2015
Guideline type		Evidence-based guideline
Guideline methodology		The information has been prepared using a multidisciplinary approach with reference to the best information and evidence available at the time of preparation
Quality assessment of evidence and grading of strength of recommendations		Not mentioned
Guideline Currency	Literature search date	Not mentioned
	Search strategy	Unclear
Methodological quality of guideline
AGREE II scores	Domain 1. Scope and Purpose	0.94
	Domain 2. Stakeholder Involvement	0.92
	Domain 3. Rigor of Development	0.63
	Domain 4. Clarity of Presentation	0.89
	Domain 5. Applicability	0.79
	Domain 6. Editorial Independence	1
	Overall assessment	Recommend
Recommendation extraction and assessment
Diagnosis of GDM
Health question 1		Risk factors
Specific recommendation		NONE
Strength of recommendation
Supporting evidence
Consistency appraisal	Search strategy and selection of evidence
	Evidence and interpretation
	Interpretation and recommendation
Health question 2		Screening
Specific recommendation		1.With risk factors: Perform an early OGTT (or HbA1c) with first antenatal bloods or at the first antenatal visit (in the first trimester) • If the early OGTT (or HbA1c) is normal, repeat OGTT at 24–28 weeks as for women with no risk factors No risk factors: Routinely recommend an OGTT to all pregnant women, who are not known to have GDM, at 24–28 weeks gestational age
Strength of recommendation		Unclear
Supporting evidence		Unclear
Consistency appraisal	Search strategy and selection of evidence	2
	Evidence and interpretation	4
	Interpretation and recommendation	4
Health question 3		Diagnostic criteria
Specific recommendation		2.GDM diagnosis is based on the results of the fasting 75 g OGTT, using the following criteria: one or more of the following values: Fasting 5.1–6.9 mmol/L 1 hour Greater than or equal to 10.0 mmol/L 2 hours 8.5–11.0 mmol/L
Strength of recommendation		Unclear
Supporting evidence		Unclear
Consistency appraisal	Search strategy and selection of evidence	2
	Evidence and interpretation	5
	Interpretation and recommendation	2
Prenatal Care
Health question 4		Health education
Specific recommendation		NONE
Strength of recommendation
Supporting evidence
Consistency appraisal	Search strategy and selection of evidence
	Evidence and interpretation
	Interpretation and recommendation
Health question 5		Medical nutrition therapy
Specific recommendation		3.• Refer women diagnosed with GDM to an accredited practising dietitian within 1 week of diagnosis • Consider telehealth consultation if necessary • Provide dietary advice that is culturally appropriate and individualised
Strength of recommendation		Unclear
Supporting evidence		Unclear
Consistency appraisal	Search strategy and selection of evidence	2
	Evidence and interpretation	5
	Interpretation and recommendation	5
Health question 6		Physical activity
Specific recommendation		4.Advise women that moderate physical activity is associated with a range of health benefits , improves BGLs and is not associated with adverse outcomes
Strength of recommendation		Unclear
Supporting evidence		Unclear
Consistency appraisal	Search strategy and selection of evidence	1
	Evidence and interpretation	4
	Interpretation and recommendation	2
Health question 7		Pharmacological therapy
Specific recommendation		5.①Metformin when compared to Insulin is effective at lowering blood glucose and is safe for pregnant women and their fetuses; ②Insulin is safe to use in pregnancy.
Strength of recommendation		Unclear
Supporting evidence		Unclear
Consistency appraisal	Search strategy and selection of evidence	2
	Evidence and interpretation	3
	Interpretation and recommendation	4
Health question 8		Blood glucose monitoring
Specific recommendation		Refer to "Target blood glucise values"
Strength of recommendation
Supporting evidence
Consistency appraisal	Search strategy and selection of evidence
	Evidence and interpretation
	Interpretation and recommendation
Health question 9		Target blood glucose values
Specific recommendation		6.Recommend BGL self-monitoring to women diagnosed with GDM. Suggested capillary BGLs (not supported by strong evidence) are: • Fasting: less than or equal to 5.0 mmol/L • 1 hour after commencing meal: less than or equal to 7.4 mmol/L • 2 hours after commencing meal: less than or equal to 6.7 mmol/L
Strength of recommendation		Unclear
Supporting evidence		Unclear
Consistency appraisal	Search strategy and selection of evidence	3
	Evidence and interpretation	5
	Interpretation and recommendation	4
Health question 10		Ketone monitoring
Specific recommendation		NONE
Strength of recommendation
Supporting evidence
Consistency appraisal	Search strategy and selection of evidence
	Evidence and interpretation
	Interpretation and recommendation
Health question 11		HbA1c monitoring
Specific recommendation		NONE
Strength of recommendation
Supporting evidence
Consistency appraisal	Search strategy and selection of evidence
	Evidence and interpretation
	Interpretation and recommendation
Health question 12		Continuous glucose monitoring
Specific recommendation		NONE
Strength of recommendation
Supporting evidence
Consistency appraisal	Search strategy and selection of evidence
	Evidence and interpretation
	Interpretation and recommendation
Health question 13		Fetal monitoring
Specific recommendation		7.Women with GDM require increased surveillance throughout pregnancy, maintain a high index of suspicion for associated conditions (e.g.preeclampsia) Reassess the requirement for increased antenatal contact with multidisciplinary team members at each contact.Review BGL self-monitoring records at each contact
Strength of recommendation		Unclear
Supporting evidence		Unclear
Consistency appraisal	Search strategy and selection of evidence	1
	Evidence and interpretation	1
	Interpretation and recommendation	2
Intrapartum Care
Health question 14		Timing and mode of birth
Specific recommendation		NONE
Strength of recommendation
Supporting evidence
Consistency appraisal	Search strategy and selection of evidence
	Evidence and interpretation
	Interpretation and recommendation
Health question 15		Glycemic control during labor
Specific recommendation		NONE
Strength of recommendation
Supporting evidence
Consistency appraisal	Search strategy and selection of evidence
	Evidence and interpretation
	Interpretation and recommendation
Neonatal Care
Health question 16		Neonatal hypoglycemia
Specific recommendation		NONE
Strength of recommendation
Supporting evidence
Consistency appraisal	Search strategy and selection of evidence
	Evidence and interpretation
	Interpretation and recommendation
Health question 17		Initial assessment
Specific recommendation		NONE
Strength of recommendation
Supporting evidence
Consistency appraisal	Search strategy and selection of evidence
	Evidence and interpretation
	Interpretation and recommendation
Postpartum Care
Health question 18		Blood glucose control
Specific recommendation		NONE
Strength of recommendation
Supporting evidence
Consistency appraisal	Search strategy and selection of evidence
	Evidence and interpretation
	Interpretation and recommendation
Health question 19		Information and follow-up
Specific recommendation		8.• Support and encourage women to breastfeed • Provide advice and information to the woman on the importance of breastfeeding for both mother and newborn • Offer early additional skilled lactation support and assistance with breastfeeding to women with GDM • Refer to the Queensland Clinical Guideline: Breast feeding initiation
Strength of recommendation		Unclear
Supporting evidence		Unclear
Consistency appraisal	Search strategy and selection of evidence	1
	Evidence and interpretation	4
	Interpretation and recommendation	2
Health question 20		Postnatal blood glucose testing
Specific recommendation		NONE
Strength of recommendation
Supporting evidence
Consistency appraisal	Search strategy and selection of evidence
	Evidence and interpretation
	Interpretation and recommendation
