# Supplementary material for: Current guidelines on the management of gestational diabetes mellitus: a content analysis and appraisal
Source: BMC Pregnancy Childbirth. 2019 Jun 13;19:200. doi: 10.1186/s12884-019-2343-2 (PMC6567433; doi:10.1186/s12884-019-2343-2)
Supplement: Supplementary file 12 — Recommendations Extraction of A.N.D. guideline. The guideline focused on nutrition practiece during the treatment of women with GDM. There were 15 relevant recommendations being extracted, which were displayed and appraised in Additional file 12. (XLSX 15 kb) [file 12884_2019_2343_MOESM12_ESM.xlsx]

## Sheet: AND
Basic information
Title of guideline		Gestational Diabetes (2016) Evidence-Based Nutrition Practice Guideline
Development institute		A.N.D.
Publication year		Published 2016
Guideline type		Evidence-based guideline
Guideline methodology		Evidence-based Nutrition Practice Guidelines (EBNPGs) and their supporting systematic reviews (SR) are developed by a multidisciplinary team, with oversight by the Academy of Nutrition and Dietetics' Evidence-Based Practice Committee (EBPC)
Quality assessment of evidence and grading of strength of recommendations		Unclear
Guideline Currency	Literature search date	Not mentioned
	Search strategy	Unclear
Methodological quality of guideline
AGREE II scores	Domain 1. Scope and Purpose	1
	Domain 2. Stakeholder Involvement	0.89
	Domain 3. Rigor of Development	0.58
	Domain 4. Clarity of Presentation	1
	Domain 5. Applicability	0.31
	Domain 6. Editorial Independence	1
	Overall assessment	Recommend
Recommendation extraction and assessment
Diagnosis of GDM
Health question 1		Risk factors
Specific recommendation		NONE
Strength of recommendation
Supporting evidence
Consistency appraisal	Search strategy and selection of evidence
	Evidence and interpretation
	Interpretation and recommendation
Health question 2		Screening
Specific recommendation		NONE
Strength of recommendation
Supporting evidence
Consistency appraisal	Search strategy and selection of evidence
	Evidence and interpretation
	Interpretation and recommendation
Health question 3		Diagnostic criteria
Specific recommendation		NONE
Strength of recommendation
Supporting evidence
Consistency appraisal	Search strategy and selection of evidence
	Evidence and interpretation
	Interpretation and recommendation
Prenatal Care
Health question 4		Health education
Specific recommendation		NONE
Strength of recommendation
Supporting evidence
Consistency appraisal	Search strategy and selection of evidence
	Evidence and interpretation
	Interpretation and recommendation
Health question 5		Medical nutrition therapy
Specific recommendation		1.Pregnant women who are diagnosed with gestational diabetes mellitus (GDM), should be referred to a registered dietitian nutritionist (RDN) for medical nutrition therapy (MNT).	2.The registered dietitian nutritionist (RDN) should assess the food and nutrition-related history of women with gestational diabetes mellitus (GDM)	3.The RDN should assess the following anthropometric measurements in women with GDM, including but not limited to: Height, current weight, pre-pregnancy weight and body mass index (BMI) Weight changes during pregnancy.	4.The RDN should evaluate available data of women with GDM and recommend as indicated: Biochemical data, medical tests and procedures	5.The RDN should evaluate available data regarding the client history and nutrition-focused physical findings of women with GDM	6.The registered dietitian nutritionist (RDN) should provide medical nutrition therapy (MNT) that includes an individual nutrition prescription and nutrition counseling for all women diagnosed with gestational diabetes mellitus (GDM).	7.For women with gestational diabetes mellitus (GDM), the registered dietitian nutritionist (RDN) should individualize the calorie prescription based on a thorough nutrition assessment with guidance from relevant references and encourage adequate caloric intake to promote fetal/neonatal and maternal health, achieve glycemic goals, and promote appropriate gestational weight gain (GWG).	8.In women with gestational diabetes mellitus (GDM), the registered dietitian nutritionist (RDN) should provide adequate amounts of macronutrients to support pregnancy, based on nutrition assessment, with guidance from the Dietary Reference Intakes (DRI). The DRI for all pregnant women, including those with GDM, recommends a minimum of 175g carbohydrate (CHO), a minimum of 71g protein (or 1.1g pe…	9.The RDN should individualize both the amount and type of CHO at breakfast based on nutrition assessment, treatment goals, blood glucose response and patient needs. If the woman with GDM continues to experience elevated PPBG after breakfast, the RDN may further modify the amount or the type of CHO at breakfast to achieve blood glucose targets.	10.The registered dietitian nutritionist (RDN) should encourage women with gestational diabetes melliltus (GDM) to make healthy food choices and consume a variety of foods to meet the micronutrient needs of pregnancy.	11.In women with gestational diabetes mellitus (GDM), the registered dietitian nutritionist (RDN) should distribute the total calories and carbohydrate (CHO) into smaller meals and multiple snacks per day. The distribution should be individualized, based on blood glucose levels, physical activity and medication, if any (e.g., insulin) and adjusted as needed. Three meals and two or more snacks hel…	12.In pregnant women with gestational diabetes mellitus (GDM), who choose to consume high-intensity sweeteners, the registered dietitian nutritionist (RDN) should educate the woman to select only those approved or generally recognized as safe (GRAS) by the US Food and Drug Administration (FDA) and to limit her intake to the acceptable daily intake (ADI), established by the FDA.	13.The registered dietitian nutritionist (RDN) should reinforce abstinence from alcohol during pregnancy for women with gestational diabetes mellitus (GDM).	14.Following the nutrition intervention of women with gestational diabetes mellitus (GDM), to check progress, the registered dietitian nutritionist (RDN) should monitor and evaluate the following components at each visit and compare to desired individual outcomes relevant to the nutrition diagnosis and nutrition intervention.
Strength of recommendation		Strong	Consensus	Consensus	Consensus	Consensus	Strong	Fair	consensus	Fair	consensus	consensus	consensus	consensus	Consensus
Supporting evidence		ADA, the Endocrine Society's guideline, several studies; not graded	Unclear	Unclear	Unclear	ADA, ACOG, IOM, et al. Several studies; not graded	Several studies; consensus	Dietary Reference Intakes (DRI), Institute of Medicine (IOM); several studies; grade III	Unclear	Several studies; not graded	Unclear	Several studies; not graded	AND, ADA; several studies; not graded	CDC; several studies; not graded	ACOG; several studies; not graded
Consistency appraisal	Search strategy and selection of evidence	6	6	6	6	6	6	6	6	6	6	6	6	6	6
	Evidence and interpretation	5	5	5	5	5	6	6	6	6	6	6	6	6	6
	Interpretation and recommendation	5	6	6	6	6	6	6	6	6	6	6	6	6	6
Health question 6		Physical activity
Specific recommendation		15.Unless contraindicated, the registered dietitian nutritionist (RDN) should encourage women with gestational diabetes mellitus (GDM) to engage in a goal to achieve daily moderate exercise of 30 minutes or more per day.
Strength of recommendation		Strong
Supporting evidence		ACOG; several studies; not graded
Consistency appraisal	Search strategy and selection of evidence	6
	Evidence and interpretation	6
	Interpretation and recommendation	6
Health question 7		Pharmacological therapy
Specific recommendation		NONE
Strength of recommendation
Supporting evidence
Consistency appraisal	Search strategy and selection of evidence
	Evidence and interpretation
	Interpretation and recommendation
Health question 8		Blood glucose monitoring
Specific recommendation		NONE
Strength of recommendation
Supporting evidence
Consistency appraisal	Search strategy and selection of evidence
	Evidence and interpretation
	Interpretation and recommendation
Health question 9		Target blood glucose values
Specific recommendation		NONE
Strength of recommendation
Supporting evidence
Consistency appraisal	Search strategy and selection of evidence
	Evidence and interpretation
	Interpretation and recommendation
Health question 10		Ketone monitoring
Specific recommendation		NONE
Strength of recommendation
Supporting evidence
Consistency appraisal	Search strategy and selection of evidence
	Evidence and interpretation
	Interpretation and recommendation
Health question 11		HbA1c monitoring
Specific recommendation		NONE
Strength of recommendation
Supporting evidence
Consistency appraisal	Search strategy and selection of evidence
	Evidence and interpretation
	Interpretation and recommendation
Health question 12		Continuous glucose monitoring
Specific recommendation		NONE
Strength of recommendation
Supporting evidence
Consistency appraisal	Search strategy and selection of evidence
	Evidence and interpretation
	Interpretation and recommendation
Health question 13		Fetal monitoring
Specific recommendation		NONE
Strength of recommendation
Supporting evidence
Consistency appraisal	Search strategy and selection of evidence
	Evidence and interpretation
	Interpretation and recommendation
Intrapartum Care
Health question 14		Timing and mode of birth
Specific recommendation		NONE
Strength of recommendation
Supporting evidence
Consistency appraisal	Search strategy and selection of evidence
	Evidence and interpretation
	Interpretation and recommendation
Health question 15		Glycemic control during labor
Specific recommendation		NONE
Strength of recommendation
Supporting evidence
Consistency appraisal	Search strategy and selection of evidence
	Evidence and interpretation
	Interpretation and recommendation
Neonatal Care
Health question 16		Neonatal hypoglycemia
Specific recommendation		NONE
Strength of recommendation
Supporting evidence
Consistency appraisal	Search strategy and selection of evidence
	Evidence and interpretation
	Interpretation and recommendation
Health question 17		Initial assessment
Specific recommendation		NONE
Strength of recommendation
Supporting evidence
Consistency appraisal	Search strategy and selection of evidence
	Evidence and interpretation
	Interpretation and recommendation
Postpartum Care
Health question 18		Blood glucose control
Specific recommendation		NONE
Strength of recommendation
Supporting evidence
Consistency appraisal	Search strategy and selection of evidence
	Evidence and interpretation
	Interpretation and recommendation
Health question 19		Information and follow-up
Specific recommendation		NONE
Strength of recommendation
Supporting evidence
Consistency appraisal	Search strategy and selection of evidence
	Evidence and interpretation
	Interpretation and recommendation
Health question 20		Postnatal blood glucose testing
Specific recommendation		NONE
Strength of recommendation
Supporting evidence
Consistency appraisal	Search strategy and selection of evidence
	Evidence and interpretation
	Interpretation and recommendation
